# Supplementary material for: Enhanced Neural Empathic Responses in Patients with Spino-Bulbar Muscular Atrophy: An Electrophysiological Study
Source: MDPI journal article supplement (doi:10.3390/brainsci11010016), 2020-12-24
Supplement: s1 [file s1]

Supplementary Table 1. Scores and comparisons of neuropsychological screenings and explicit dispositional empathy assessments

| Test                   | Patients |           | Controls |           | Mann-Whitney |                         | Cohen's <i>d</i> |
|------------------------|----------|-----------|----------|-----------|--------------|-------------------------|------------------|
|                        | <i>M</i> | <i>SD</i> | <i>M</i> | <i>SD</i> | <i>U</i>     | <i>p<sub>corr</sub></i> |                  |
| Forward Digit Span     | 5.78     | 1.35      | 5.89     | 0.76      | 172          | .70                     | .10              |
| Backwards Digit Span   | 4.50     | 1.10      | 4.56     | 0.92      | 170          | .70                     | .05              |
| Phonemic Fluency Test  | 40.39    | 11.90     | 46.67    | 13.42     | 210          | .70                     | .50              |
| Prose Memory Test      | 14.84    | 1.71      | 13.92    | 1.42      | 91.5         | .99                     | .59              |
| Trail Making Test B-A  | 39.67    | 18.29     | 34.94    | 10.78     | 134.5        | .95                     | .31              |
| Mental Rotation Test   | 6.72     | 4.90      | 5.56     | 2.23      | 155.5        | .88                     | .31              |
| IRI Empathic Concern   | 26.63    | 4.51      | 26.22    | 2.65      | 115          | .70                     | .11              |
| IRI Perspective Taking | 22.83    | 3.91      | 23.00    | 3.77      | 174.50       | .70                     | .04              |

*Notes.* The table reports the means and the standard deviations of all neuropsychological screenings and explicit dispositional empathy assessments for both patients and control participants. Trail Making Test B-A is the difference between the B and A subtests. The comparison between patients' and controls' scores are reported through Mann-Whitney U tests and Cohen's *d* effect size (details in manuscript).

Cohen's effect size, small:  $d = 0.2$ , medium:  $d = 0.5$ , large:  $d = 0.8$  [1].

1. Cohen, J. *Statistical Power Analysis for the Behavioral Sciences*; Routledge Academic: New York, NY, 1988
